# Supplementary material
Source: Royal Society of Chemistry journal article supplement (doi:10.1039/d6nj01007e)
Supplement: d6nj01007e1.pdf [file d6nj01007e1.pdf]

## Supporting Information

### Enhanced Red Phosphorescence of Purely Organic Formyl Compounds via Host–Guest Doping

$^1\text{H}$  NMR (500 MHz, Chloroform- $d$ )  $\delta$  10.08 (d,  $J = 1.8$  Hz, 1H), 8.72 (q,  $J = 1.9$  Hz, 2H), 8.04 – 7.93 (m, 2H), 7.84 – 7.72 (m, 2H), 7.59 – 7.48 (m, 2H)

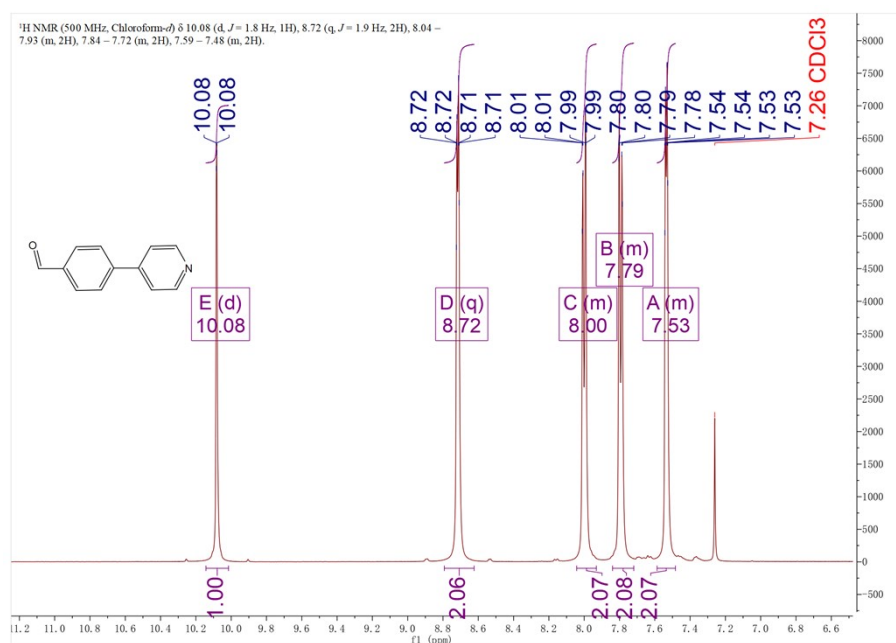

Figure S1. Nuclear Magnetic Resonance hydrogen spectrum ( $^1\text{H}$  NMR) of 4PB.

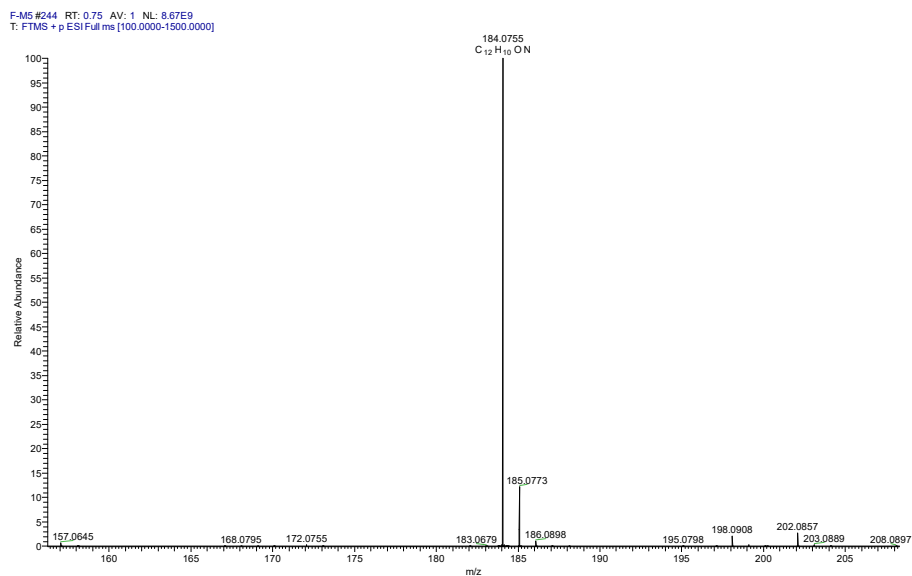

Figure S2. High Resolution Mass Spectrometry (HRMS) of 4PB (183).

<sup>1</sup>H NMR (500 MHz, Chloroform-*d*) δ 13.17 (s, 2H), 10.81 (s, 2H), 8.34 (s, 1H), 7.98 (d, *J* = 9.1 Hz, 1H), 7.80 (d, *J* = 8.0 Hz, 1H), 7.64 – 7.60 (m, 1H), 7.43 (d, *J* = 7.5 Hz, 1H), 7.14 (s, 1H).

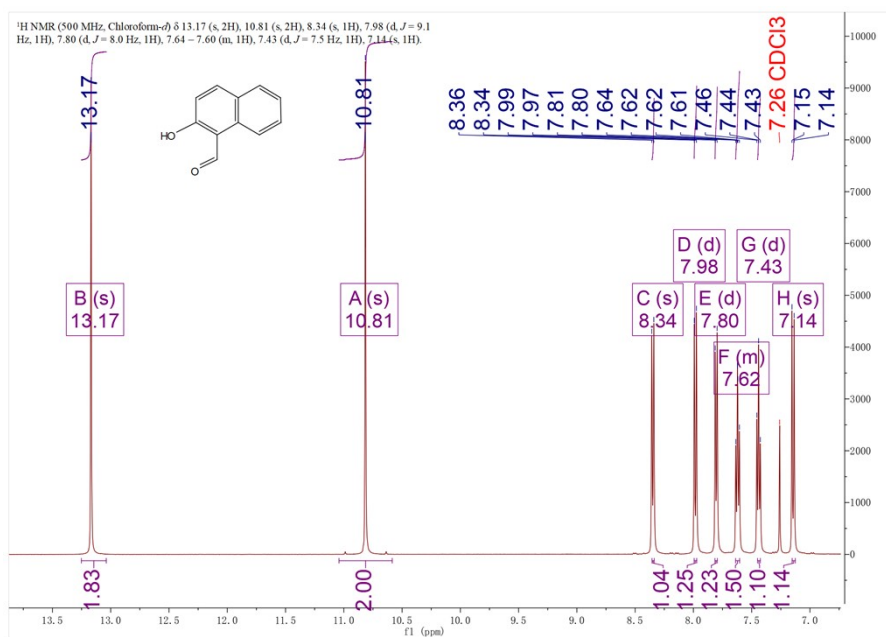

Figure S3. Nuclear Magnetic Resonance hydrogen spectrum (<sup>1</sup>H NMR) of 2HN.

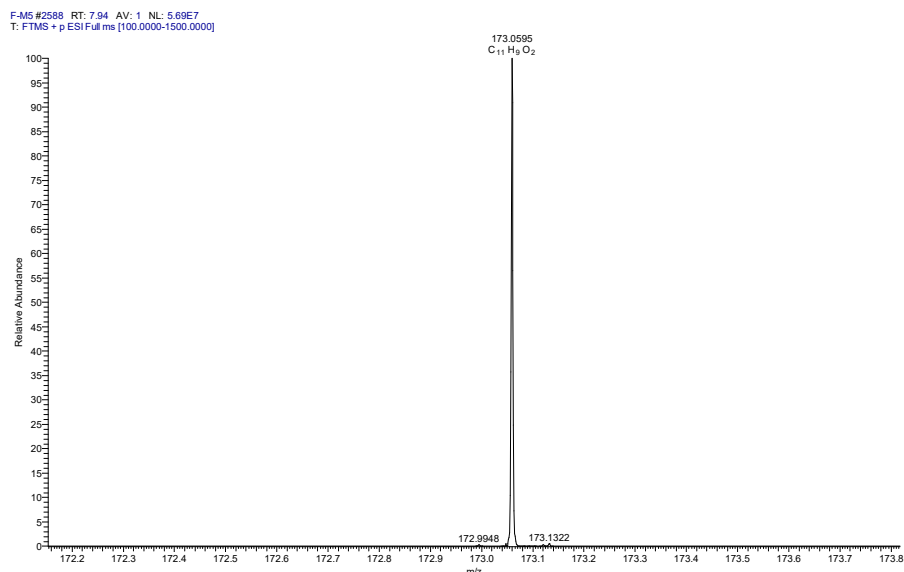

Figure S4. High Resolution Mass Spectrometry (HRMS) of 2HN (172).

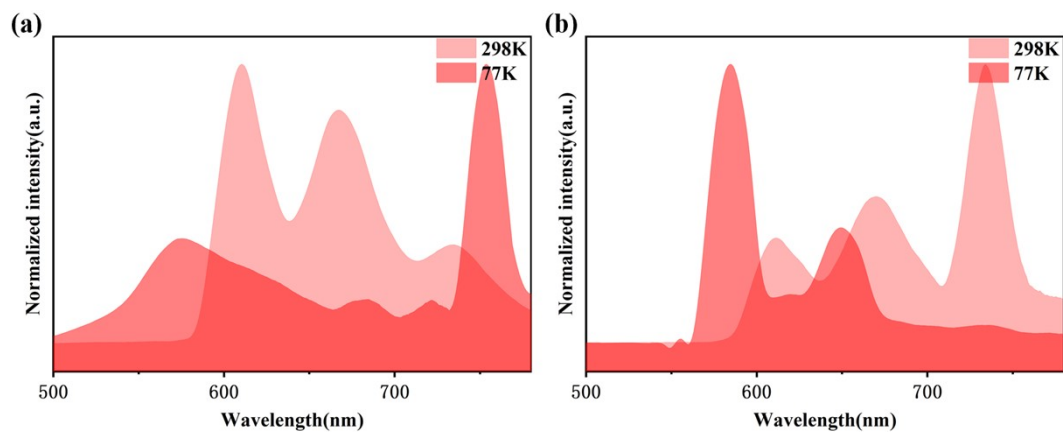

Figure S5. Phosphorescence spectra comparison of different systems at room temperature and low temperature: (a) PA-4PB and (b) PA-2HN.

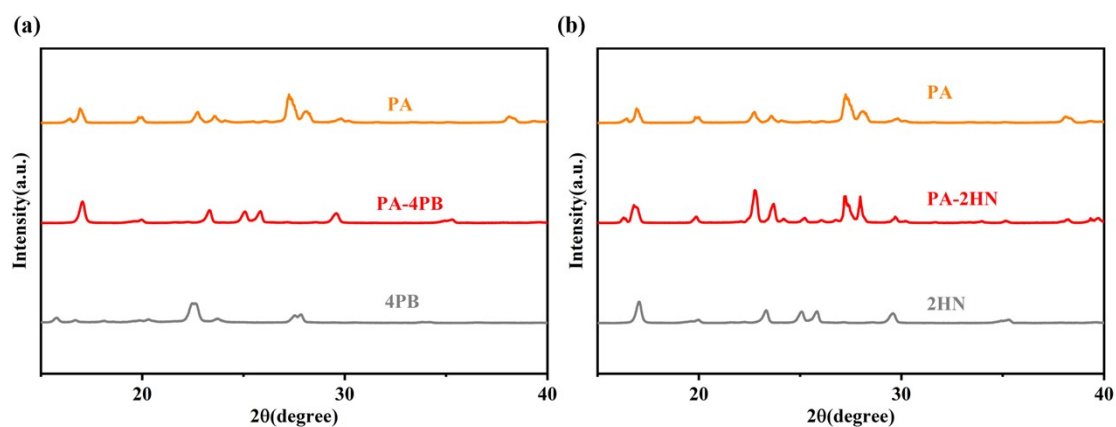

Figure S6. XRD patterns of the host-guest doped systems (a) PA-4PB and (b) PA-2HN.

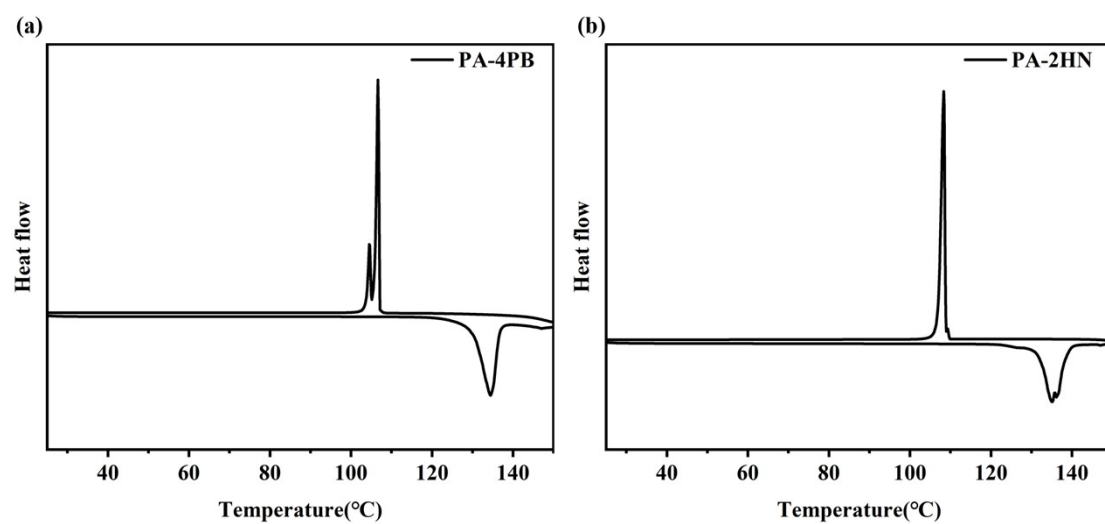

Figure S7. DSC curve for (a) PA-4PB and (b) PA-2HN.
